# Supplementary material for: Improving the Performance of a Salt Production Plant by Using Nanofiltration as a Pretreatment
Source: MDPI journal article supplement (doi:10.3390/membranes12121191), 2022-11-25
Supplement: s1 [file s1]

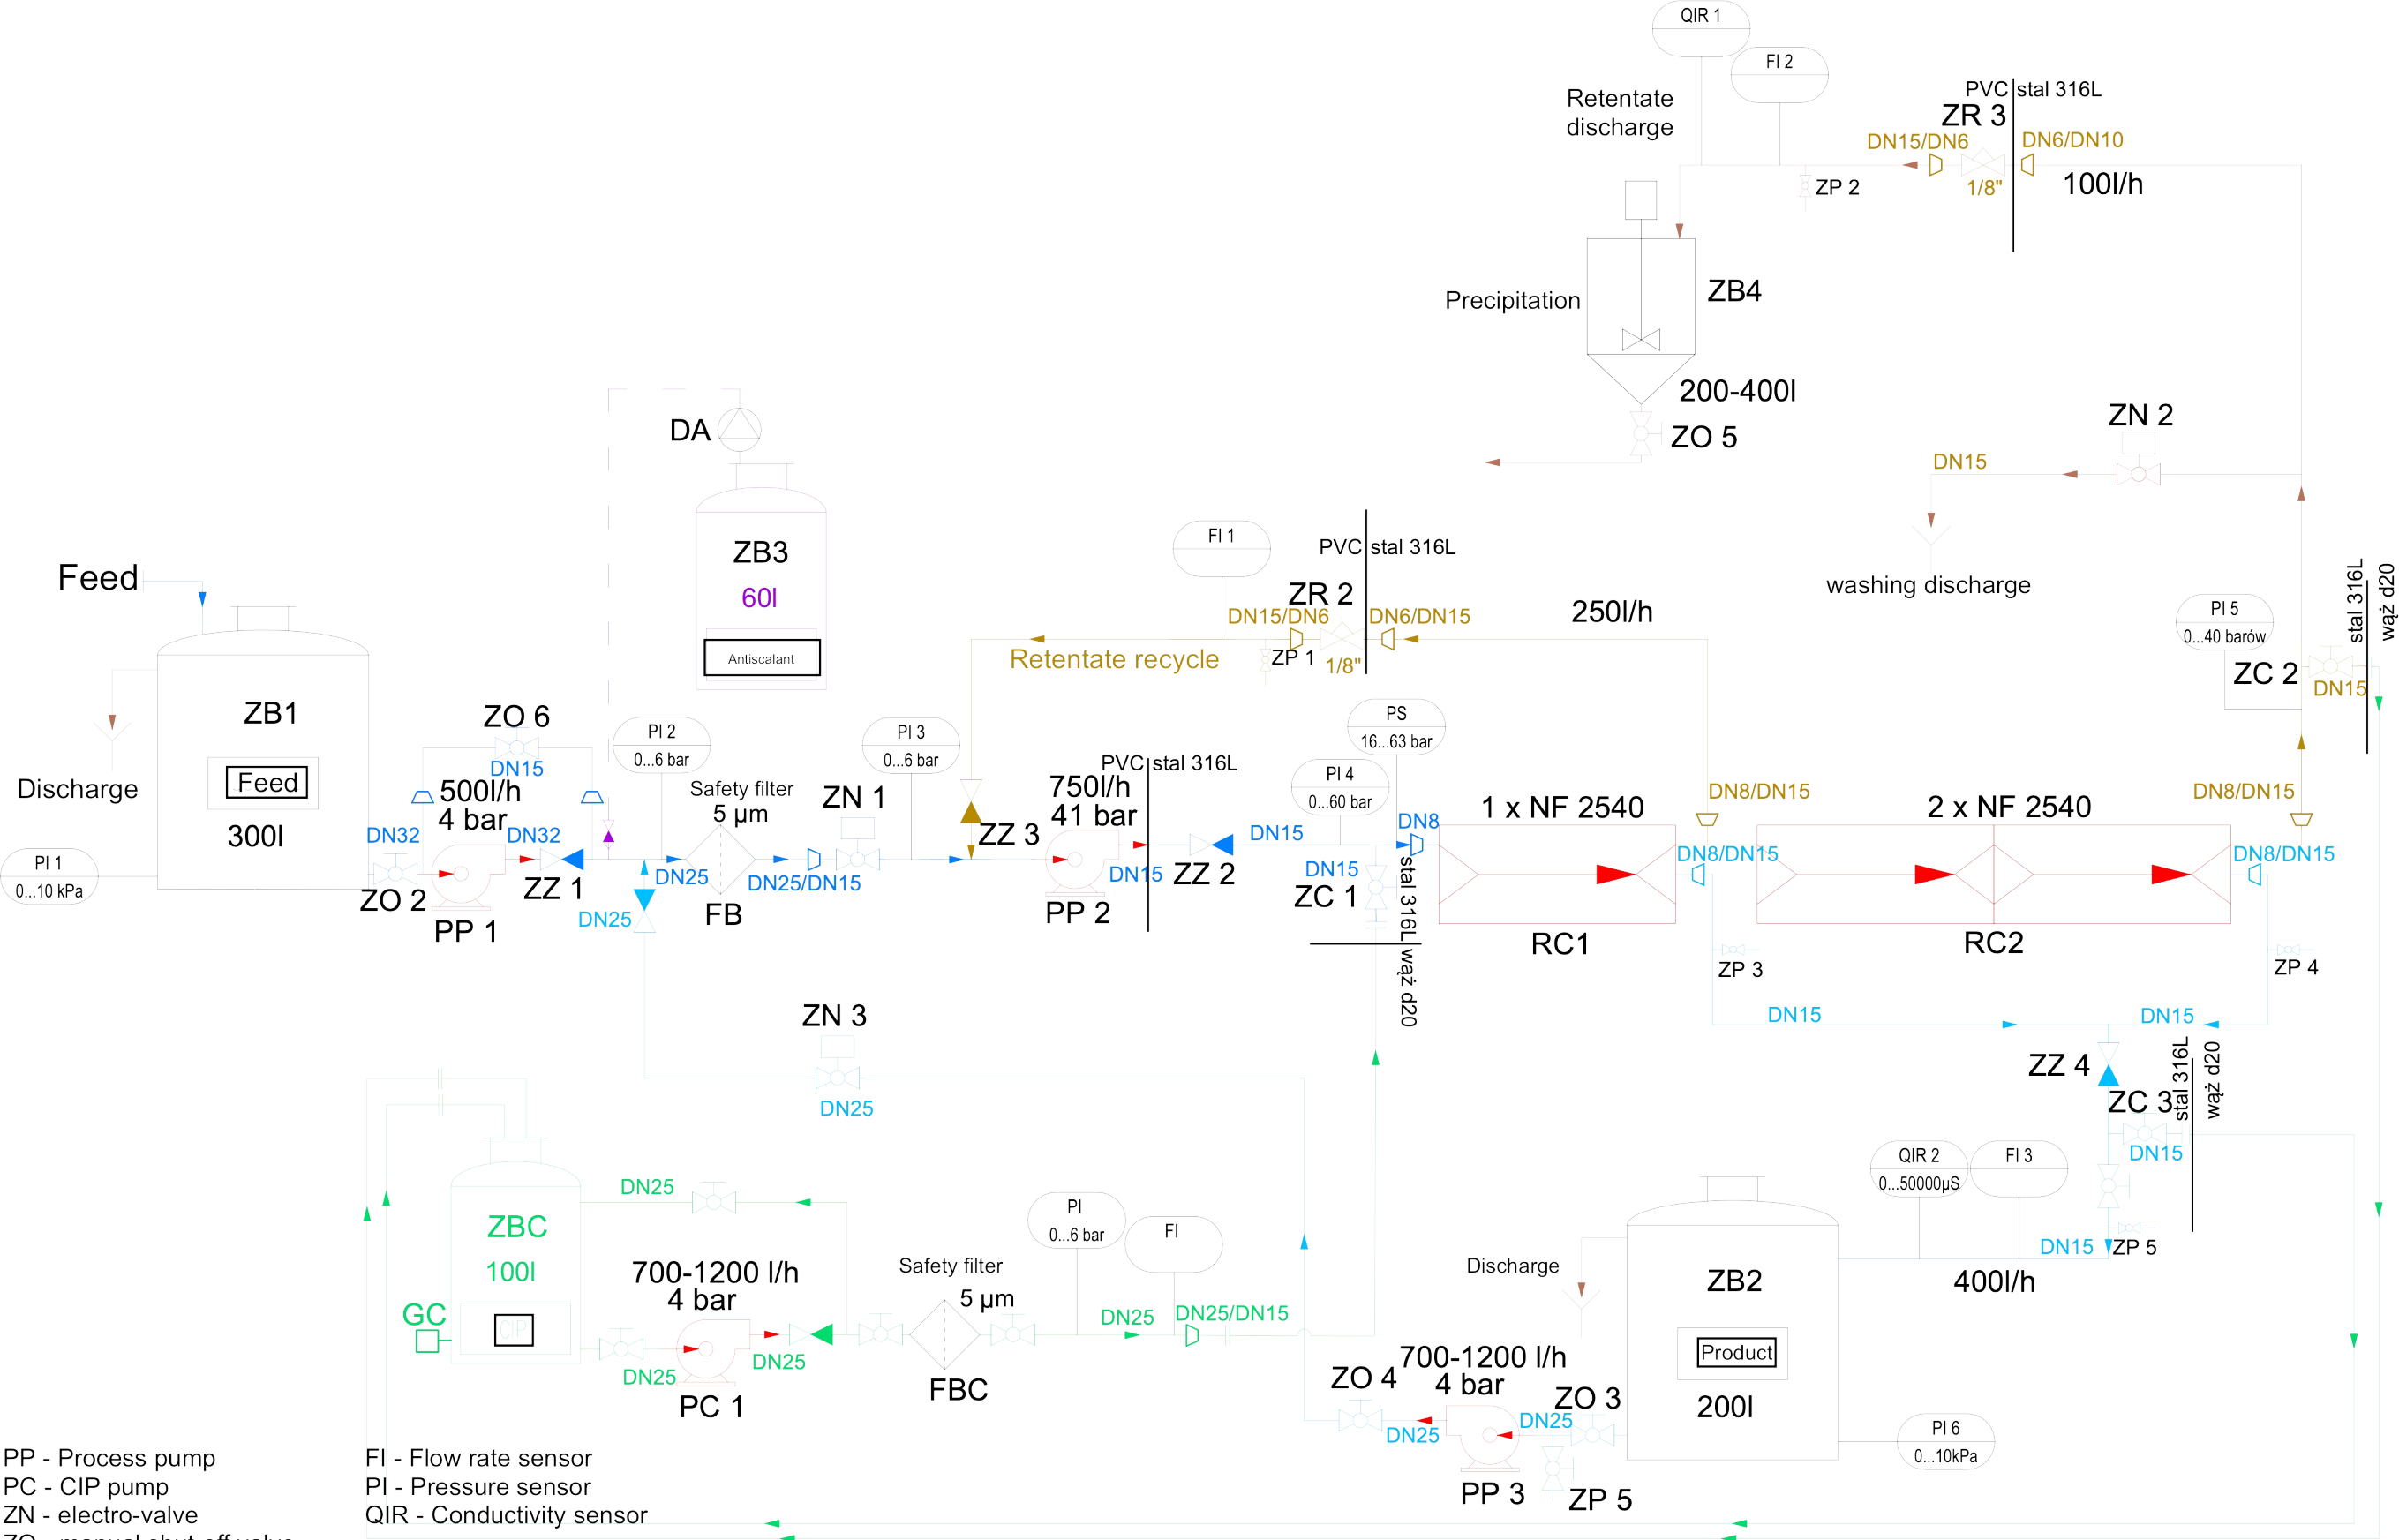

PP - Process pump  
PC - CIP pump  
ZN - electro-valve  
ZO - manual shut-off valve  
ZR - regulation valve  
ZZ - check valve  
ZC - manual CIP check valve
